# Supplementary material for: Efficient All-Polymer Solar Cells Enabled by Interface Engineering
Source: MDPI journal article supplement (doi:10.3390/polym14183835), 2022-09-14
Supplement: s1 [file s1]

SI:

## Efficient All-Polymer Solar Cells Enabled by Interface Engineering

Guoping Zhang<sup>1†</sup>, Lihong Wang<sup>1†</sup>, Chaoyue Zhao<sup>1†</sup>, Yajie Wang<sup>1</sup>, Ruiyu Hu<sup>1</sup>, Jiaxu Che<sup>1</sup>, Siying He<sup>1</sup>, Wei Chen<sup>2,\*</sup>, Leifeng Cao<sup>2</sup>, Zhenghui Luo<sup>3,\*</sup>, Mingxia Qiu<sup>1,\*</sup>, Shunpu Li<sup>1,\*</sup> and Guangye Zhang<sup>1,\*</sup>

<sup>1</sup> College of New Materials and New Energies, Shenzhen Technology University, Shenzhen 518118, China

<sup>2</sup> College of Engineering Physics, Shenzhen Technology University, Shenzhen 518118, China

<sup>3</sup> College of Materials Science and Engineering, Shenzhen University, Shenzhen 518060, China

\* Correspondence: chenwei@sztu.edu.cn, zhhuiluo@szu.edu.cn, qiumingxia@sztu.edu.cn, lishunpu@sztu.edu.cn, zhangguangye@sztu.edu.cn.

† These authors contributed equally to this work.

Device characterization.

SCLC Measurements: The electron- and hole-mobilities were measured using space charge limited current (SCLC) method. The device architecture of the electron-only devices were ITO/PNDIT-F3N/active layer/PNDIT-F3N/Ag and ITO/PDINN/active layer/PDINN/Ag. The device architecture of the hole-only devices was ITO/PEDOT:PSS/active layer/Au. The charge carrier mobilities were determined by fitting the dark current into the model of a single carrier SCLC according to the equation:  $J = 9\epsilon_0\epsilon_r\mu V^2/8d^3$ , where  $J$  is the current density,  $d$  is the film thickness of the active layer,  $\mu$  is the charge carrier mobility,  $\epsilon_r$  is the relative dielectric constant of the transport medium, and  $\epsilon_0$  is the permittivity of free space.  $V = V_{app} - V_{bi}$ , where  $V_{app}$  is the applied voltage,  $V_{bi}$  is the offset voltage. The carrier mobilities were calculated from the slope of the  $J \sim V^2$  curves.

**Table S1** EQE,  $\mu_{th}$  and  $\mu_e$  of PM6:PYF-T-*o*/PNDIT-F3N, PM6:PYF-T-*o*/PDINN, PM6:PY-IT/PNDIT-F3N and PM6:PY-IT/PDINN.

| Samples                                 | $J_{EQE}$<br>(mA/cm <sup>2</sup> ) | $\mu_{th}$<br>[cm <sup>2</sup> V <sup>-1</sup> s <sup>-1</sup> ] | $\mu_e$<br>[cm <sup>2</sup> V <sup>-1</sup> s <sup>-1</sup> ] |
|-----------------------------------------|------------------------------------|------------------------------------------------------------------|---------------------------------------------------------------|
| PM6:PYF-T- <i>o</i> /PNDIT-F3N<br>(BHJ) | 23.90                              | 1.83E-04                                                         | 1.34E-04                                                      |
| PM6:PYF-T- <i>o</i> /PDINN<br>(BHJ)     | 24.30                              | 1.83E-04                                                         | 1.76E-04                                                      |
| PM6 :PY-IT/PNDIT-F3N<br>(BHJ)           | 23.45                              | 2.65E-04                                                         | 1.17E-04                                                      |
| PM6 :PY-IT/PDINN<br>(BHJ)               | 23.51                              | 2.65E-04                                                         | 2.91E-04                                                      |

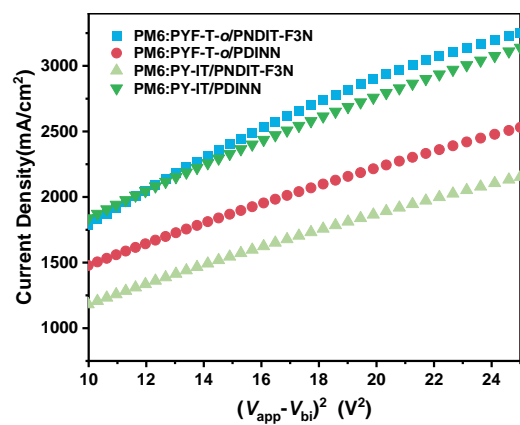

**Figure S1** Electron mobility curves of PM6:PYF-T-*o*/PNDIT-F3N, PM6:PYF-T-*o*/PDINN, PM6:PY-IT/PNDIT-F3N and PM6:PY-IT/PDINN.

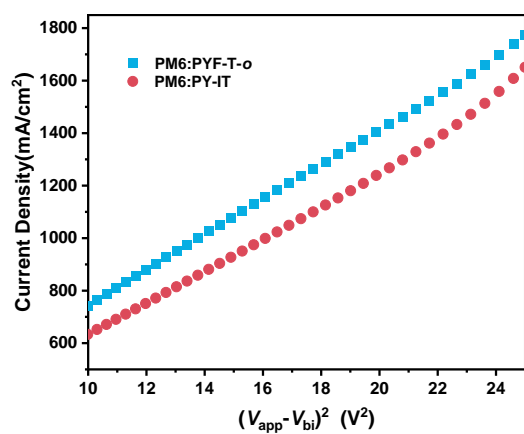

**Figure S2** Hole mobility curves of PM6:PYF-T-*o* and PM6:PY-IT.

**Table S2 Device optimization: The spin coating parameters of active layer are compared.**

| Devices                              | $V_{oc}$ [V] | $J_{sc}$ [mA/cm <sup>2</sup> ] | FF [%] | PCE [%] |
|--------------------------------------|--------------|--------------------------------|--------|---------|
| PM6:PYF-T-o( 2000rpm)<br>/ PNDIT-F3N | 0.910        | 24.4                           | 66.8   | 14.8    |
| PM6:PYF-T-o (3000rpm)<br>/PNDIT-F3N  | 0.912        | 23.8                           | 66.8   | 14.4    |
| PM6:PYF-T-o( 2000rpm)<br>/PDINN      | 0.911        | 24.6                           | 65.6   | 14.8    |
| PM6:PYF-T-o (3000rpm)<br>/PDINN      | 0.912        | 23.8                           | 66.4   | 14.5    |
| PM6:PYIT( 2500rpm)<br>/PNDIT-F3N     | 0.911        | 24.1                           | 66.4   | 14.6    |
| PM6:PYIT(3000rpm)<br>/PNDIT-F3N      | 0.911        | 24.1                           | 66.4   | 14.6    |
| PM6:PYIT(2500rpm)<br>/PDINN          | 0.931        | 23.9                           | 69.2   | 15.4    |
| PM6:PYIT(3000rpm)<br>/PDINN          | 0.931        | 23.9                           | 70.1   | 15.6    |

**Table S3** Device optimization results. Different ETL processing conditions are compared.

| Devices                                           | V <sub>oc</sub> [V] | J <sub>sc</sub> [mA/cm <sup>2</sup> ] | FF [%] | PCE [%] |
|---------------------------------------------------|---------------------|---------------------------------------|--------|---------|
| PM6:PYF-T- <i>o</i> /<br>PDINN (0.5mg/ml、1500rpm) | 0.898               | 24.766                                | 65.321 | 14.443  |
| PM6:PYF-T- <i>o</i> /<br>PDINN (0.5mg/ml、2000rpm) | 0.902               | 25.250                                | 65.057 | 14.725  |
| PM6:PYF-T- <i>o</i> /<br>PDINN (0.5mg/ml、2500rpm) | 0.908               | 23.563                                | 67.586 | 14.365  |
| PM6:PYF-T- <i>o</i> /<br>PDINN (1.0mg/ml、2500rpm) | 0.912               | 25.640                                | 65.712 | 15.266  |
| PM6:PYF-T- <i>o</i> /<br>PDINN (1.0mg/ml、3000rpm) | 0.907               | 25.856                                | 66.660 | 15.527  |
| PM6:PYF-T- <i>o</i> /<br>PDINN (1.0mg/ml、3500rpm) | 0.907               | 25.091                                | 66.863 | 15.119  |
| PM6:PYF-T- <i>o</i> /<br>PDINN (2mg/ml、3000rpm)   | 0.911               | 24.036                                | 66.253 | 14.518  |
| PM6:PYF-T- <i>o</i> /<br>PDINN (2mg/ml、4000rpm)   | 0.912               | 24.735                                | 66.625 | 15.027  |
| PM6:PYF-T- <i>o</i> /<br>PDINN (2mg/ml、5000rpm)   | 0.913               | 23.408                                | 68.307 | 14.598  |
| PM6:PYF-T- <i>o</i> /<br>PDINN (3mg/ml、4000rpm)   | 0.910               | 24.026                                | 67.046 | 14.669  |
| PM6:PYF-T- <i>o</i> /<br>PDINN (3mg/ml、5000rpm)   | 0.912               | 24.780                                | 66.933 | 15.123  |
| PM6:PYF-T- <i>o</i> /<br>PDINN (3mg/ml、6000rpm)   | 0.911               | 24.103                                | 66.170 | 14.529  |

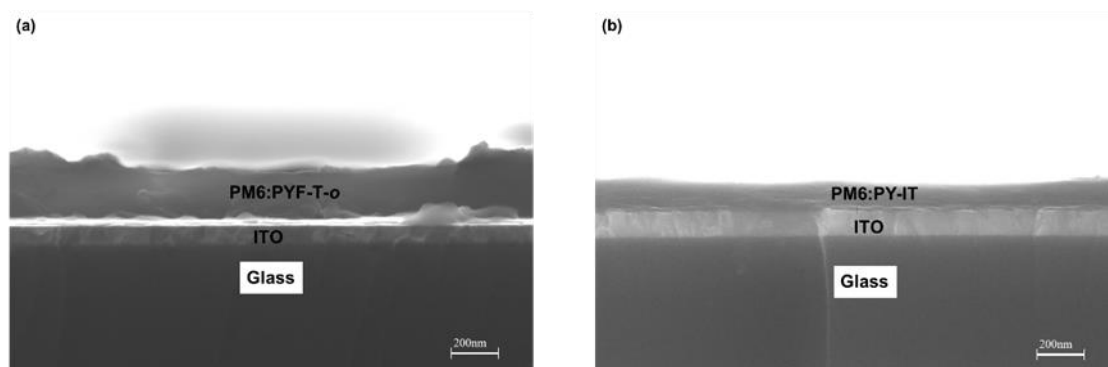

**Figure S3.** cross-sectional SEM image of each layer.
